# Supplementary material for: Developing an ICU Mortality Risk Prediction Model for Acute Myocardial Infarction Patients Based on Machine Learning
Source: Research Square preprint supplement (doi:10.21203/rs.3.rs-7859410/v1), 2025-11-04
Supplement: Supplementary file 1 [file 9bff9d1c8ec5bff28bff917a.xlsx]

## Sheet: Sheet
Coef Name	coeff_lamda
first_lactate_dehydrogenase_ld	1.21001270214274e-05
balance	1.16682508977871e-05
crrt	0.82096093709355
ECMO	0.443102222403201
vp	0.206024019451094
first_lactate	0.0960113771469763
first_rdw	0.0648589536301354
sofa	0.0491715034945653
first_troponin_t	0.0414400851330842
aki	0.036013037326878
apacheii	0.0265555452941367
first_bilirubin_total	0.0255575534738183
age	0.0155138959096567
first_anion_gap	0.00526430868349202
first_urea_nitrogen	0.00130024684152732
first_glucose	0.000202940912956828
ventilation	0
first_asparate_aminotransferase_ast	0
first_alanine_aminotransferase_alt	0
first_pt	0
first_inrpt	0
first_white_blood_cells	0
first_red_blood_cells	0
first_platelet_count	0
first_hemoglobin	0
first_hematocrit	0
first_spo2	0
first_hr	0
first_nbpd	0
first_nbpm	0
IABP	0
(Intercept)	-3.96245365575732
sepsis3_recode	-0.334607846430942
first_albumin	-0.2345412074408
first_potassium	-0.023011369576532
first_creatinine	-0.0163540102578832
first_absolute_lymphocyte_count	-0.00220839102404361
first_sodium	-0.000784408918713215
